# Supplementary material for: High Summertime Aerosol Organic Functional Group Concentrations from Marine and Seabird Sources at Ross Island, Antarctica, during AWARE
Source: Copernicus journal article supplement (doi:10.5194/acp-2017-1225), 2018-01-12
Supplement: Supplementary file 1 [file acp-2017-1225-supplement.pdf]

Supplementary Material for

**High Summertime Aerosol Organic Functional Group  
Concentrations from Marine and Seabird Sources at Ross  
Island, Antarctica, during AWARE**

Jun Liu<sup>1</sup>, Jeramy Dedrick<sup>1,2</sup>, Lynn M. Russell<sup>1</sup>, Gunnar I. Senum<sup>3</sup>, Janek Uin<sup>3</sup>, Chongai Kuang<sup>3</sup>, Stephen R. Springston<sup>3</sup>, W. Richard Leitch<sup>4</sup>, Allison C. Aiken<sup>5</sup> and Dan Lubin<sup>1</sup>

<sup>1</sup>Scripps Institution of Oceanography, University of California, San Diego, 9500 Gilman Drive, La Jolla, CA 92093;

<sup>2</sup>Now at Texas A&M University, 400 Bizzell St, College Station, TX 77843

<sup>3</sup>Environmental & Climate Sciences Department, Brookhaven National Laboratory, Building 815-E, Upton, NY 11973-5000.

<sup>4</sup>Environment and Climate Change Canada (ECCC), Toronto, ON, Canada

<sup>5</sup>Earth and Environmental Science, Earth Systems Observations, Los Alamos National Laboratory, Los Alamos, New Mexico, USA

## Figures

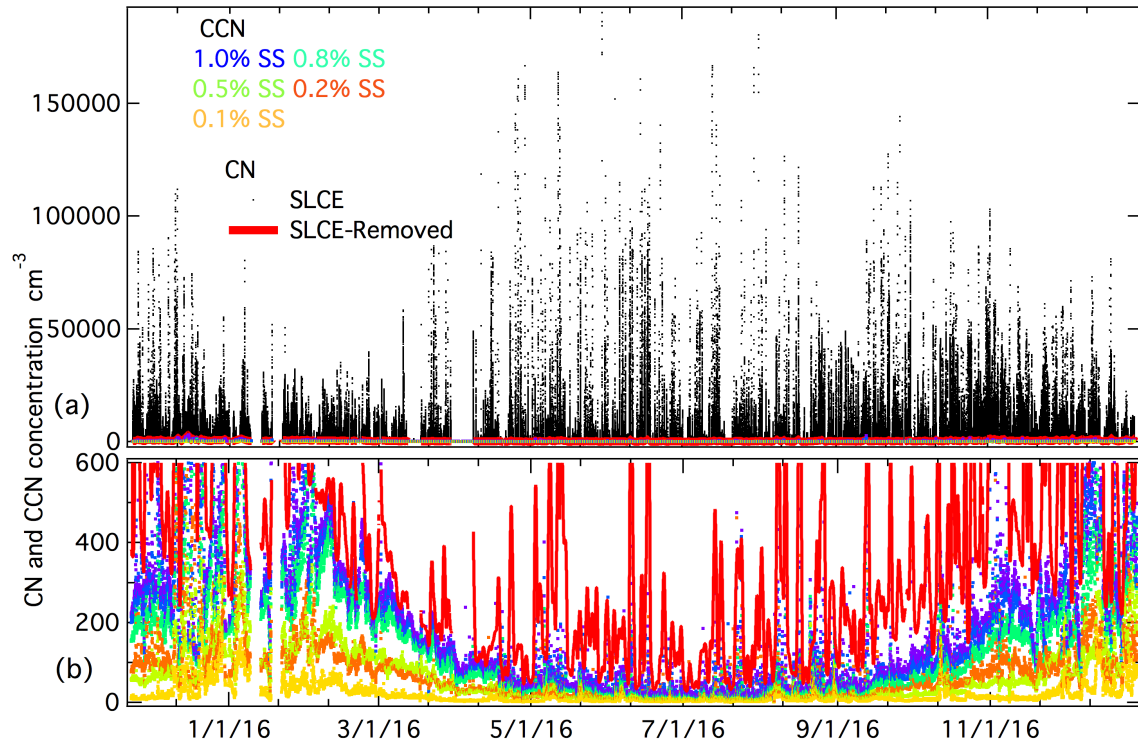

**Figure S1. CN and CCN concentration from: (a) all measured CN and CCN and (b) spike-removed CN and all measured CCN.**

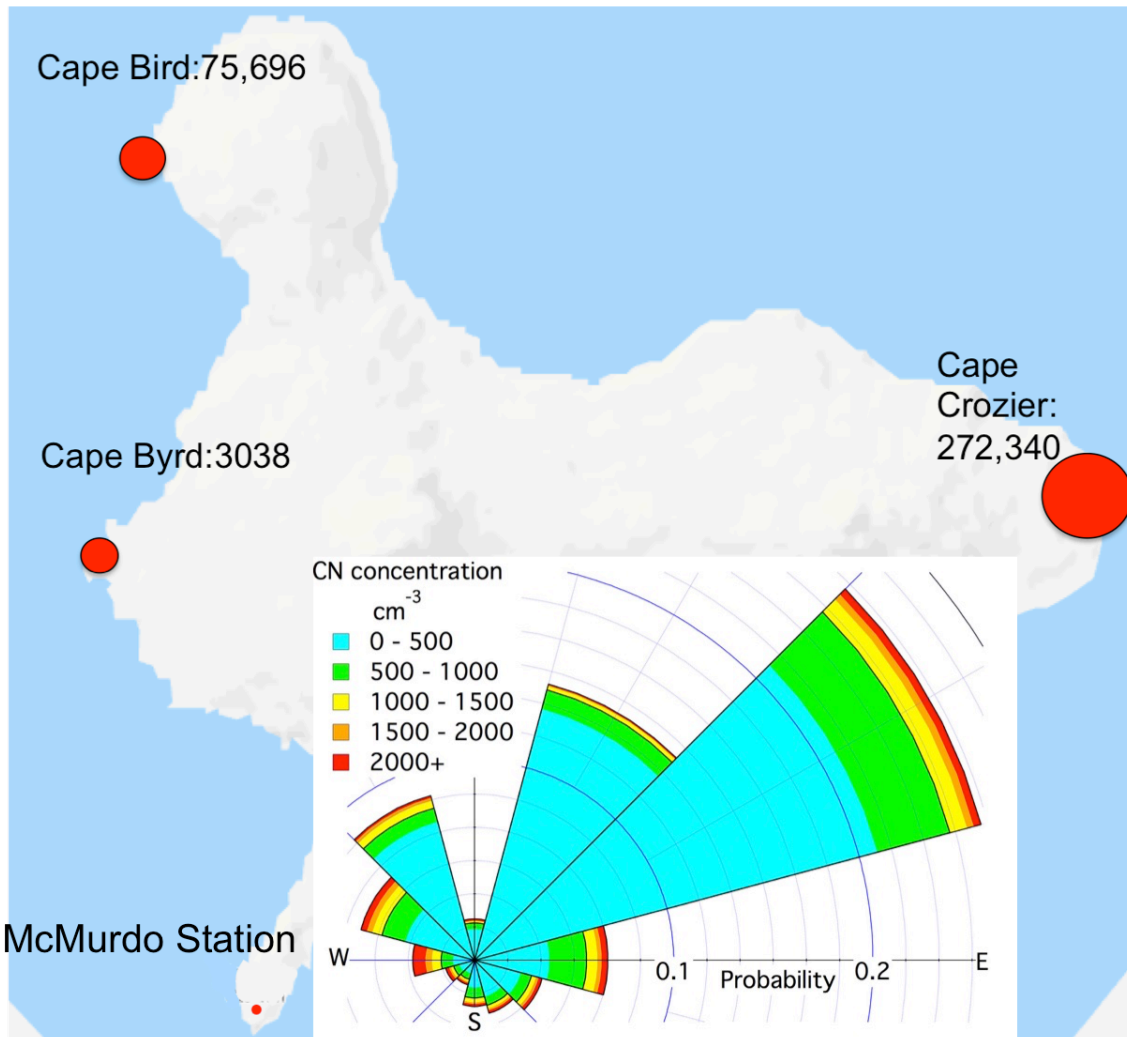

**Figure S2. Map of Ross Island with McMurdo Station and penguin colonies ( penguin numbers from Lyver et al., (2014) ) marked on the map. Windrose of CN concentration at the Cosray site is shown on the map.**

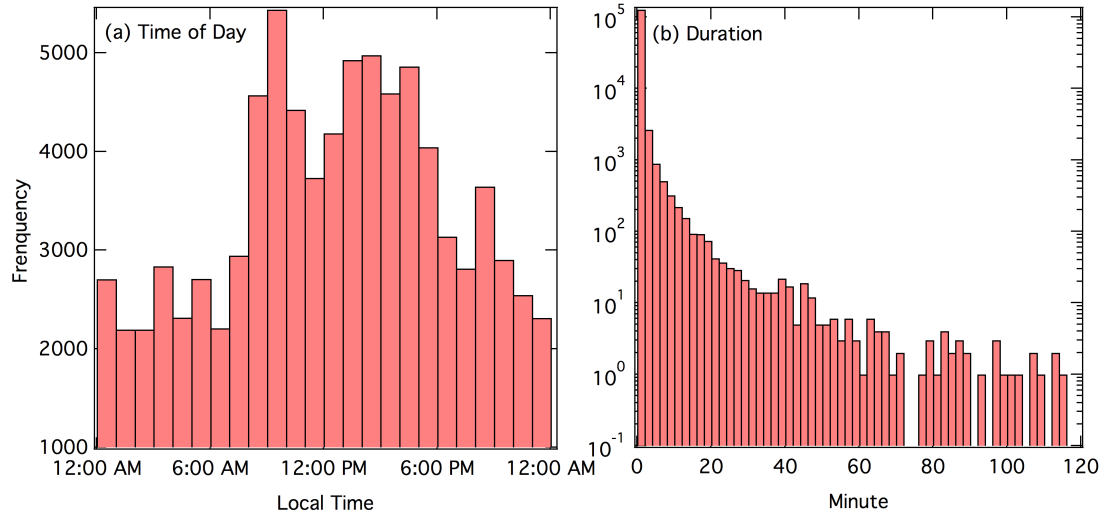

**Figure S3. Frequency distribution of SLCE with (a) Time of day, and (b) Duration.**

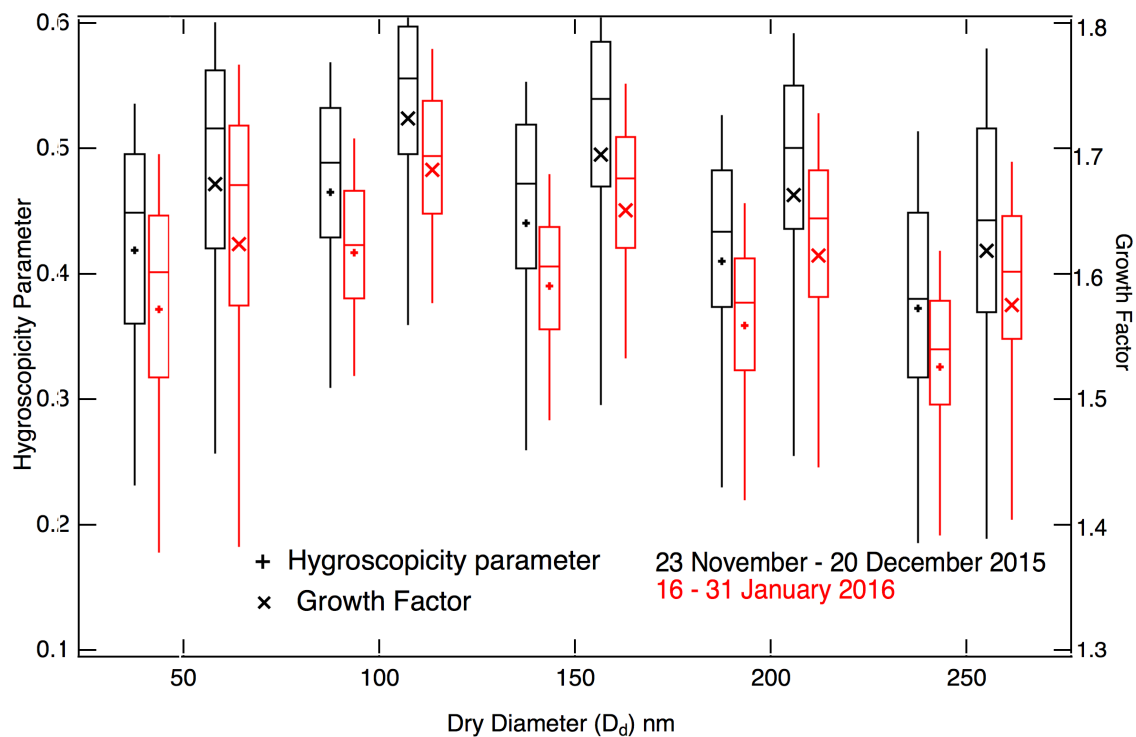

**Figure S4. Distribution of growth factor and hygroscopicity parameter  $\kappa$  in the two measurement periods from HTDMA. 5th, 25th, 50th, 75th and 90th percentiles are shown by the boxes and whiskers. Means are shown by the markers.**

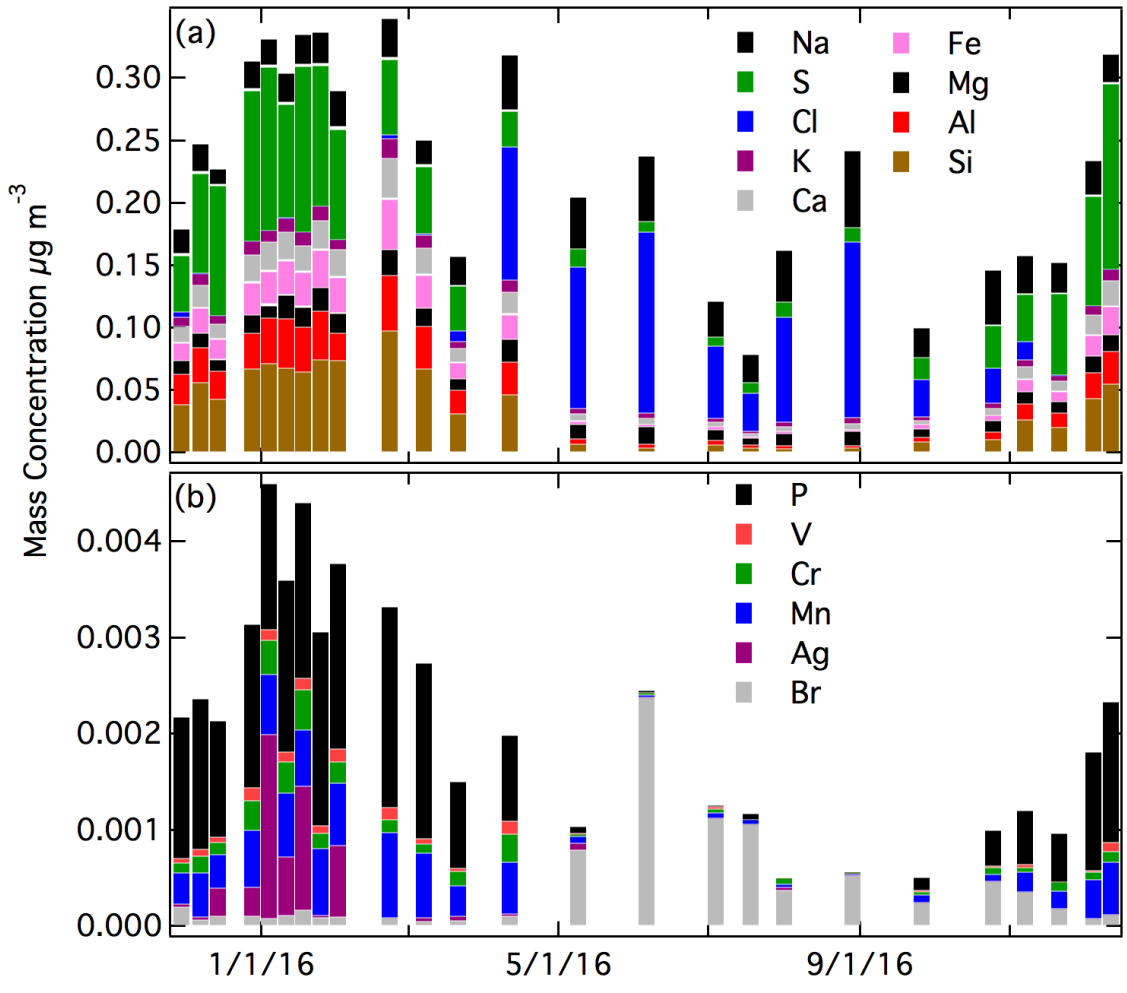

Figure S5. Elemental mass concentration from XRF.

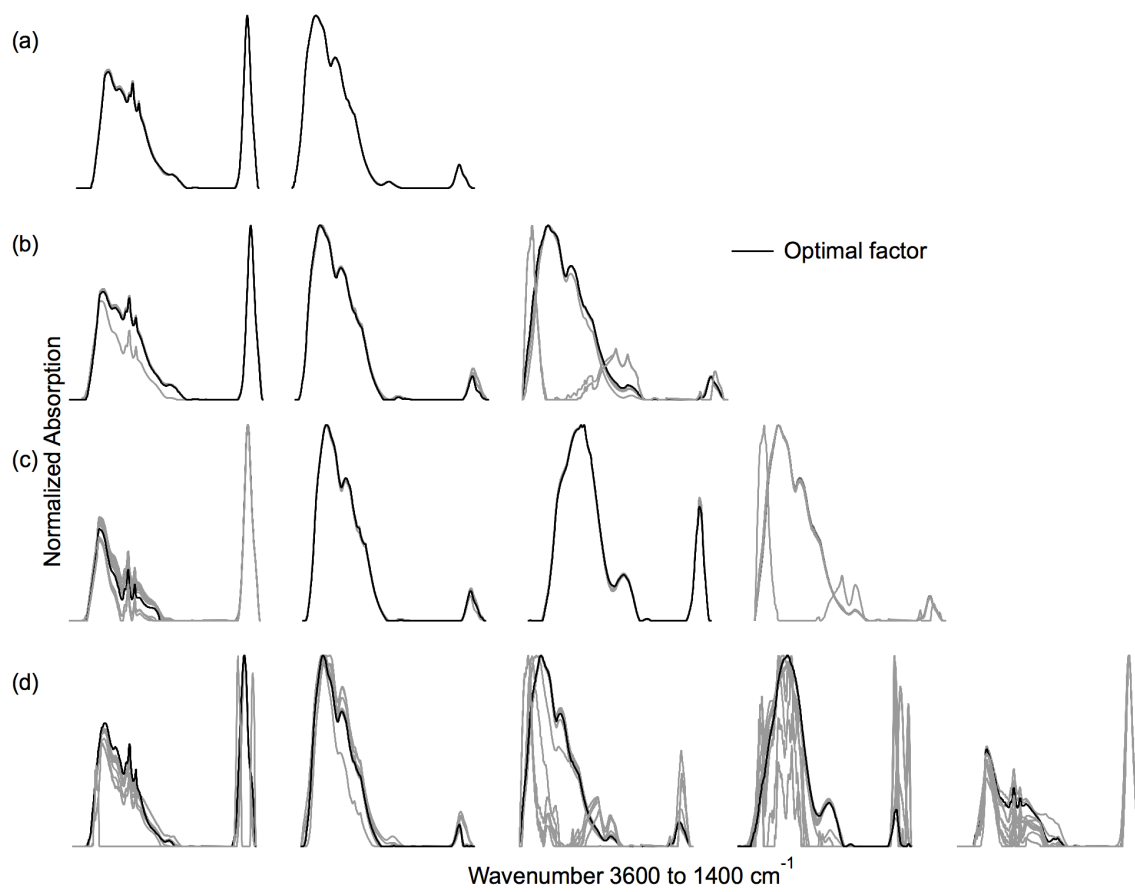

**Figure S6. FTIR PMF factors in 2 to 5 factor and -2 to 2 fpeak spaces**

## Tables

**Table S1. Marine amino acid measurements**

| Study                    | Year      | Location                              | Season           | Type               | Particle Size     | Amino Acid Concentration             |                                |                             |
|--------------------------|-----------|---------------------------------------|------------------|--------------------|-------------------|--------------------------------------|--------------------------------|-----------------------------|
|                          |           |                                       |                  |                    |                   | Free dissolved<br>ng m <sup>-3</sup> | Combined<br>ng m <sup>-3</sup> | Total<br>ng m <sup>-3</sup> |
| Mace et al. 2003b        | 2000      | Erdemli (Mediterranean coast), Turkey | Spring           | Marine             | TSP               | 33.8<br>(3.65–102)                   | –                              | –                           |
| Wedyan and Preston, 2008 | 2003      | Atlantic Ocean (cruise)               | Spring           | Marine             | TSP               | 1.83<br>(0.27–9.13)                  | 9.13<br>(1.83–36.5)            | –                           |
| Kuznetsova et al. 2005   | 2003      | Ligurian Sea (NW Mediterranean Sea)   | Spring           | Marine             | TSP               | –                                    | –                              | 225.88                      |
| Shi et al. 2010          | 2006      | Qingdao (Coastal China)               | Spring           | Marine             | TSP               | 214                                  | –                              | –                           |
|                          | 2005      | outh China Sea (cruise)               | Spring           |                    |                   | 44.5                                 | –                              | –                           |
|                          | 2005–2006 | Yellow Sea (cruise)                   | Spring           |                    |                   | 131                                  | –                              | –                           |
| Matsumoto et al. 2005    | 2000      | Western Pacific Ocean (cruise)        | Spring<br>Summer | Marine             | TSP               | 0.98<br>(0.14–2.81)                  | –                              | –                           |
| Mace et al. 2003a        | 2000      | Cape Grim, Tasmania, Australia        | Spring           | Marine             | TSP               | 8.74<br>(1.83–20.0)                  | –                              | –                           |
| Mandalakis et al. 2011   | 2007      | Finokalia, Crete island, Greece       | Summer           | Marine             | TSP               | 23.6<br>(0.82–88.7)                  | 98.4<br>(34.8–215)             | –                           |
| Violaki et al. 2010      | 2007      | Finokalia, Crete island, Greece       | Summer<br>Autumn | Marine             | PM <sub>1</sub>   | 45.6<br>–                            | –                              | –                           |
| Scalabrin et al. 2012    | 2010      | Svalbard Islands, Norway              | Summer           | Polar (Arctic)     | PM <sub>10</sub>  | 0.23<br>(0.02–0.52)                  | –                              | –                           |
|                          |           |                                       |                  |                    | PM <sub>0.5</sub> | 0.15<br>(0.02–0.43)                  | –                              | –                           |
|                          | 2010      | Faraglione Camp, Antarctica           | PM <sub>10</sub> | 1.51               | –                 | –                                    |                                |                             |
|                          | 2011      |                                       | PM <sub>1</sub>  | 1.55               | –                 | –                                    |                                |                             |
| Barbaro et al. 2015      | 2010      | Ross Sea (cruise)                     | Summer           | Polar (Antarctica) | TSP               | 0.48<br>(0.27–1.64)                  | –                              | –                           |
|                          | 2011      | Dome C Station, Antarctic plateau     |                  |                    | 0.11              | –                                    | –                              |                             |
|                          | 2012      |                                       |                  |                    | PM <sub>10</sub>  | –                                    | –                              |                             |
|                          | 2012      | Dome C Station, Antarctic plateau     |                  |                    | 0.1               | –                                    | –                              |                             |
|                          | 2013      |                                       |                  |                    | 0.1               | –                                    | –                              |                             |

Assuming an average amino acid molecular weight of 136.9 g.mol<sup>-1</sup>

Assuming an average amino acid nitrogen number of 1.



**Table S2. FTIR PMF factor number evaluation**

| Criteria \ Number of Factors                 | 2     | 3      | 4      | 5       | 6       |
|----------------------------------------------|-------|--------|--------|---------|---------|
| Q/Q <sub>exp</sub>                           | 7.06  | 6.02   | 4.75   | 3.90    | 3.25    |
| Absolute residual                            | 23.6% | 21.7%  | 17.4%  | 14.2%   | 12.0%   |
| Temporal correlation factor strength (r>0.8) | None  | None   | None   | None    | None    |
| Similarity of factor spectra (r>0.8)         | None  | 1 pair | 1 pair | 2 pairs | 4 pairs |
| Factors with less than 10% OM                | None  | None   | None   | 1       | 1       |
